# Supplementary material for: Dynamic monitoring of the fibrosis disease by a collagen targeting near infrared probe
Source: Royal Society of Chemistry journal article supplement (doi:10.1039/d3bm01926h), 2024-01-01
Supplement: d3bm01926h1.pdf [file d3bm01926h1.pdf]

Supporting Information

for

**Dynamic monitoring the fibrosis disease by collagen  
targeting near infrared probe**

*Xiaoke Zhang, Qianwen Yang, Sensen Zhou, Cheng Li\*, Xiqun Jiang\**

*Department of Polymer Science & Engineering, College of Chemistry & Chemical  
Engineering, Nanjing University, Nanjing 210023*

\*Corresponding Author(s): [jiangx@nju.edu.cn](mailto:jiangx@nju.edu.cn), [licheng@nju.edu.cn](mailto:licheng@nju.edu.cn)

## Supporting figures

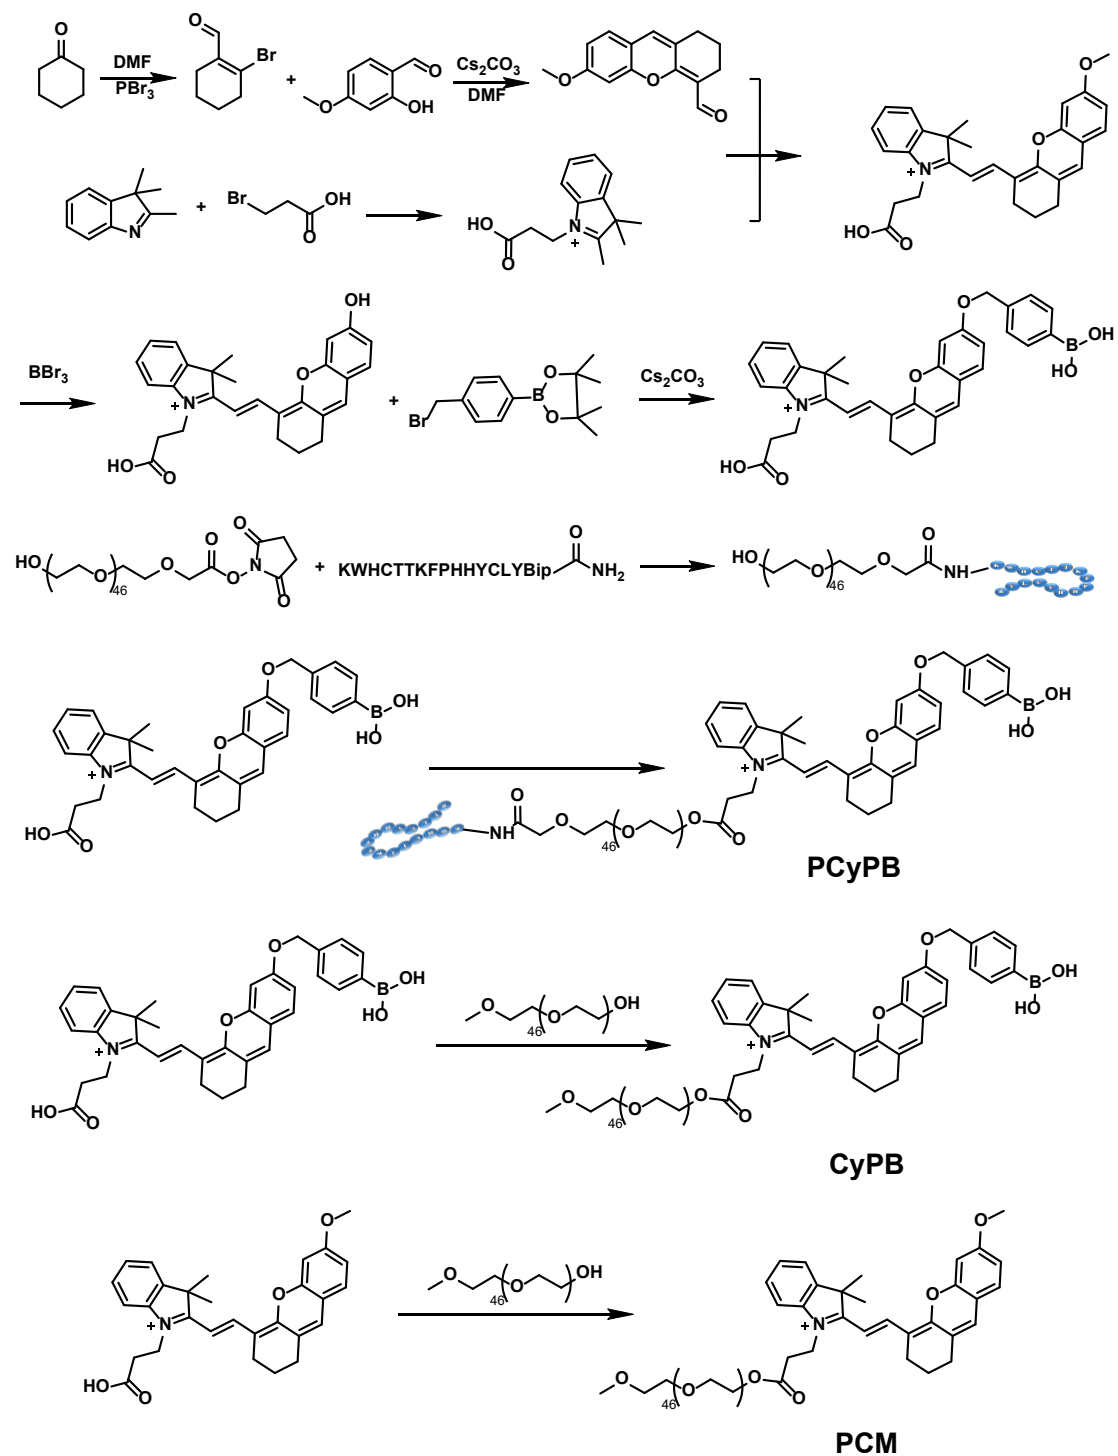

**Figure S1.** Schematic illustration of the synthetic route of the collagen targeted H<sub>2</sub>O<sub>2</sub>-NIR dyes.

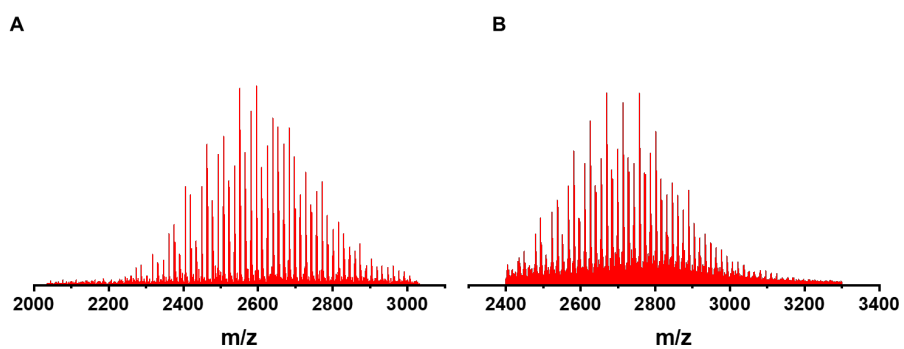

**Figure S2.** MALDI TOF spectra of the PCM (A) and CyPB (B) probes conjugated with PEG<sub>2000</sub>.

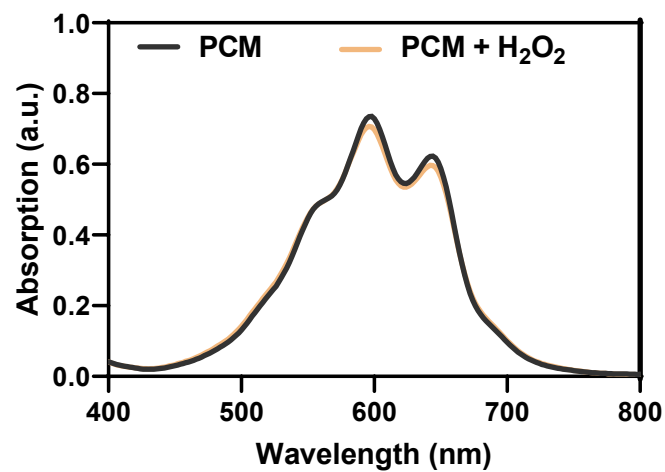

**Figure S3.** The absorption spectrum of PCM in distilled water with or without the H<sub>2</sub>O<sub>2</sub> (100  $\mu$ M).

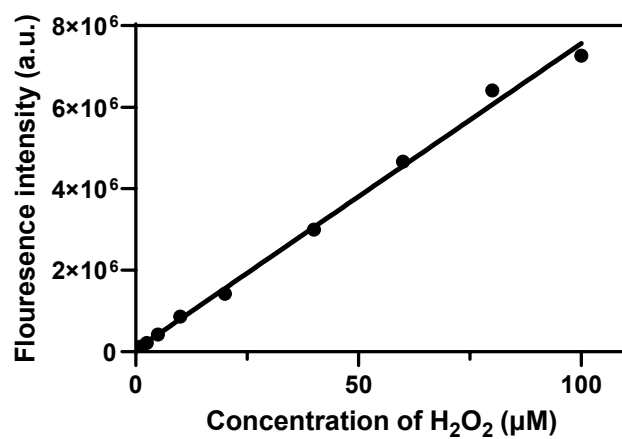

**Figure S4.** Fluorescence intensity (at 708 nm) of PCyPB (1 μM) with excitation at 680 nm at different H<sub>2</sub>O<sub>2</sub> concentration (1-100 μM).

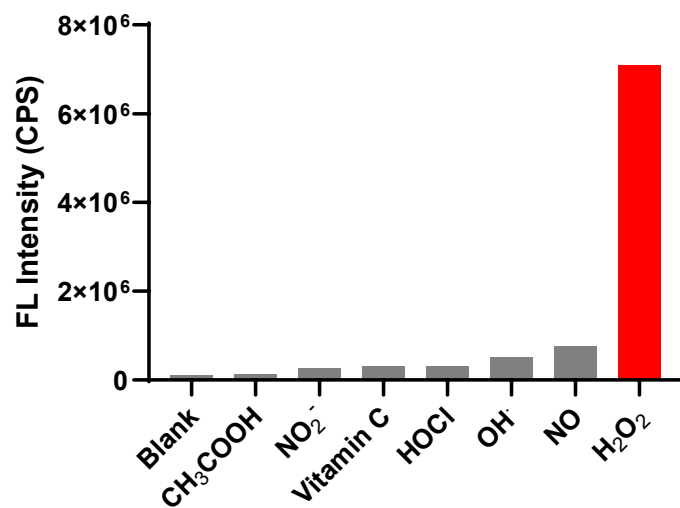

**Figure S5.** Fluorescence intensity (at 708 nm) of PCyPB (1 μM) with excitation at 680 nm in the presence of various species.

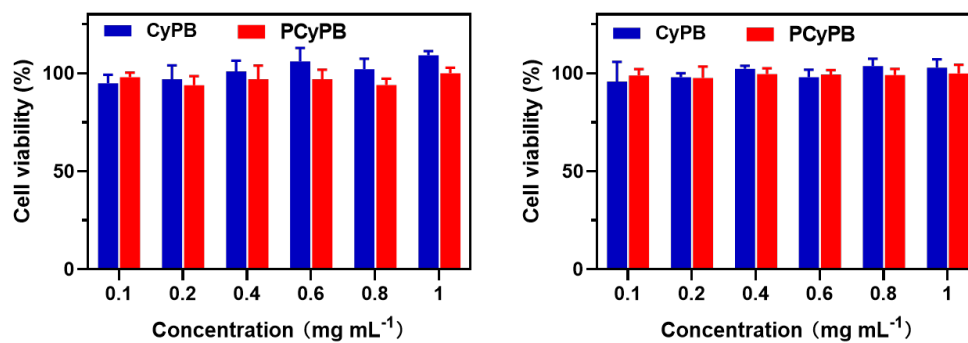

**Figure S6.** Cell viability of Pan02 tumor cells (left) and LX-2 cells (right) treated with different concentration of probes.

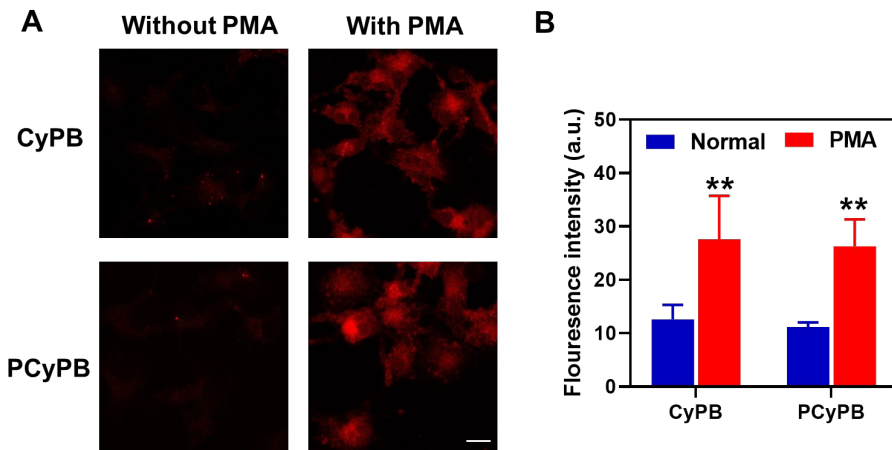

**Figure S7.** (A) Real-time fluorescence imaging of LX-2 cells treated with 5  $\mu$ M PCyPB or CyPB for 4h with or without the presence of PMA. Scale bar: 20  $\mu$ m. (B) The semiquantitative fluorescence intensity of LX-2 cells in Fig. S7A. Data are mean  $\pm$  s.e.m. and were analyzed by Student's t test. \*\* $P < 0.01$ .



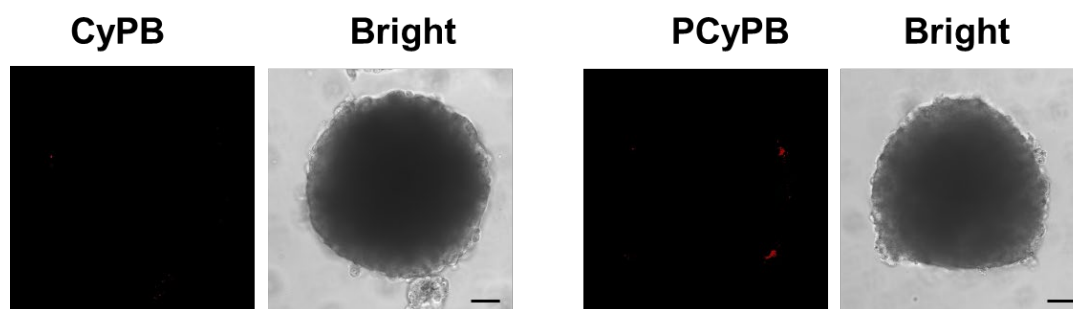

**Figure S8.** The LX-2 MCs treated with different probes without the presence of the  $H_2O_2$  show no obvious fluorescence. Scale bar: 50  $\mu m$ .

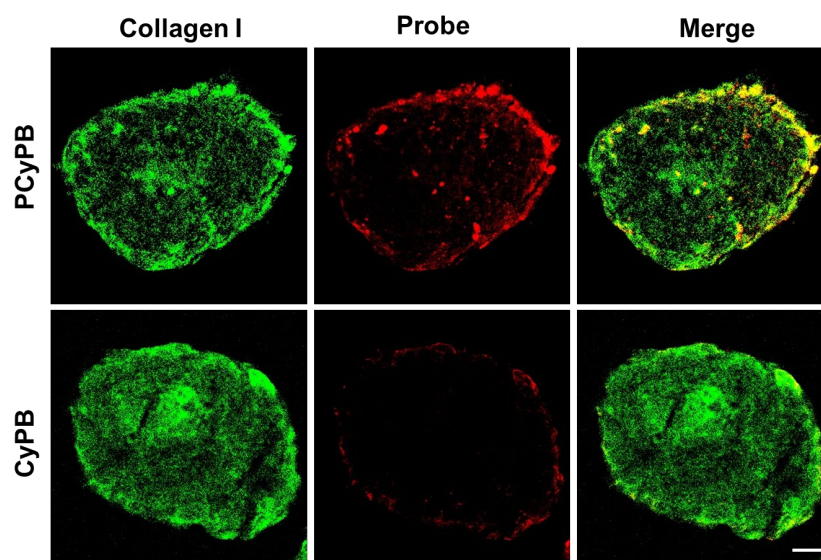

**Figure S9.** Immunofluorescence staining of the collagen (green) in LX-2 MCs treated with different probes (red) with the presence of the H<sub>2</sub>O<sub>2</sub>. Scale bar: 50  $\mu$ m.

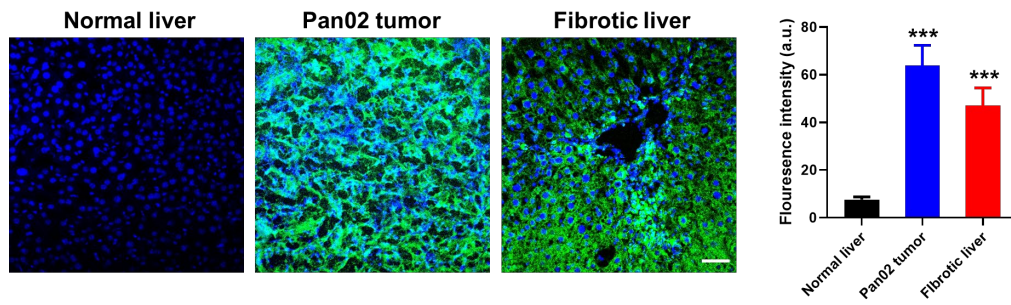

**Figure S10.** CLSM image of the H<sub>2</sub>O<sub>2</sub> level (green) in different tissue, the semiquantitative fluorescence intensity of H<sub>2</sub>O<sub>2</sub> level in different tissue was presented in the right. Scale bar: 50  $\mu$ m. Data are mean  $\pm$  s.e.m. and were analyzed by on-way ANOVA. \*\*\*P<0.001.

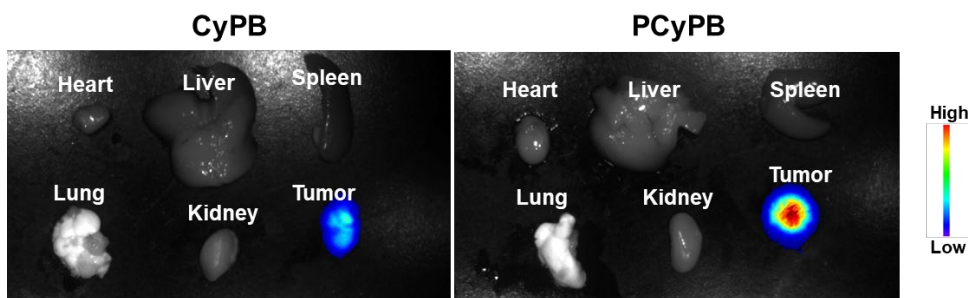

**Figure S11.** Ex vivo NIR imaging of the major organs after 96 h treated with different probes in Pan02 tumor bearing mice.

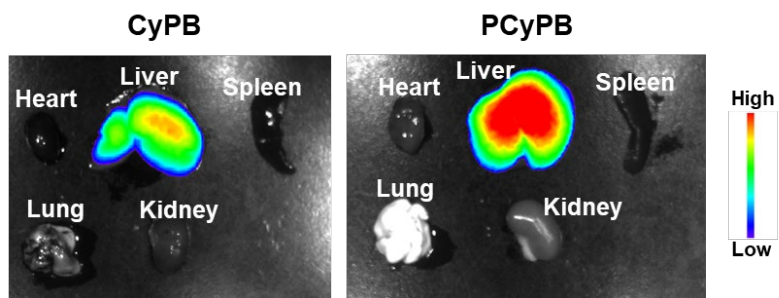

**Figure S12.** Ex vivo NIR imaging of the major organs after 96 h treated with different probes in liver fibrosis mice.

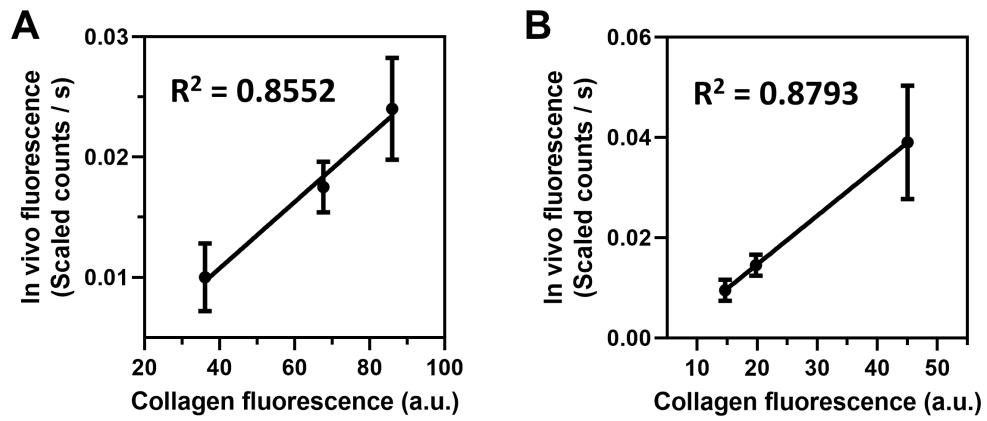

**Figure S13.** The relationship between fluorescence intensity of PCyPB and the collagen in Pan02 tumor (A) and fibrotic liver (B) obtained by analysis of Fig. 5C&D, Fig. 5G&H.
